# Supplementary material for: Glutaminases as a Novel Target for SDHB-Associated Pheochromocytomas/Paragangliomas
Source: PubMed Central journal article supplement (PMC7139890; doi:10.3390/cancers12030599), 2020-03-05
Supplement: cancers-12-00599-s001.pdf [file cancers-12-00599-s001.pdf]

# Supplementary Materials: Glutaminases as a Novel Target for SDHB-Associated Pheochromocytomas/Paragangliomas

Balazs Sarkadi, Katalin Meszaros, Ildiko Krencz, Letizia Canu, Lilla Krokker, Sara Zakarias, Gabor Barna, Anna Sebestyen, Judit Papay, Zoltan Hujber, Henriett Butz, Otto Darvasi, Peter Igaz, Judit Doczi, Michaela Luconi, Christos Chinopoulos and Attila Patocs

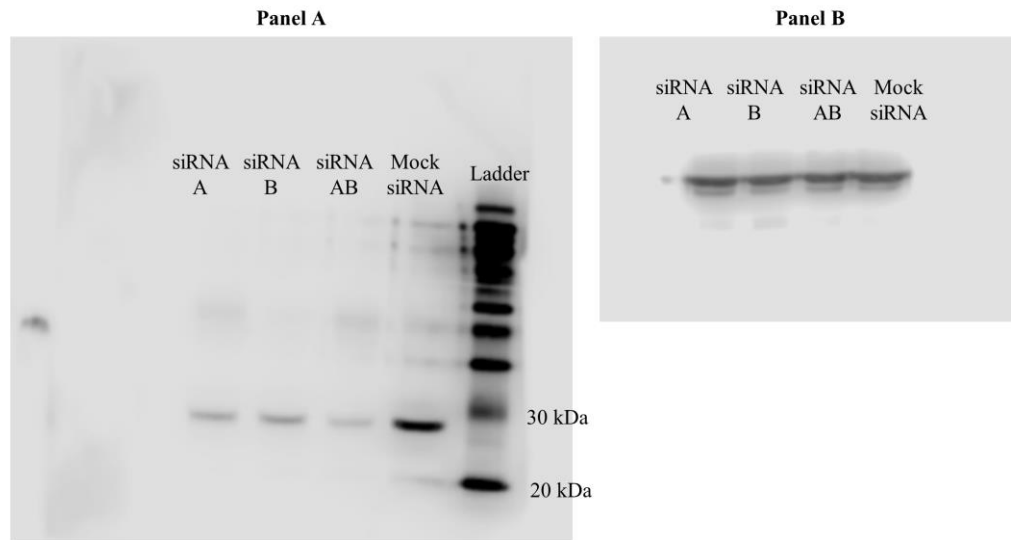

**Figure S1.** *SDHB* knockdown by *Sdhb* targeting siRNAs. Two different *SDHB* targeting siRNAs (see materials and methods) were used for *SDHB* knockdown, labeled as siRNA A and siRNA B. The combination of two siRNAs was labeled as siRNA AB (which is named as ‘*siSdhb*’ in the manuscript). Panel A: *Sdhb* targeted Western blot membrane after transfection with siRNA A, siRNA B, mock siRNA or the combination of siRNA A and B. Panel B:  $\beta$ -actin targeted Western blot membrane after transfection with siRNA A, siRNA B, mock siRNA or the combination of siRNA A and B.

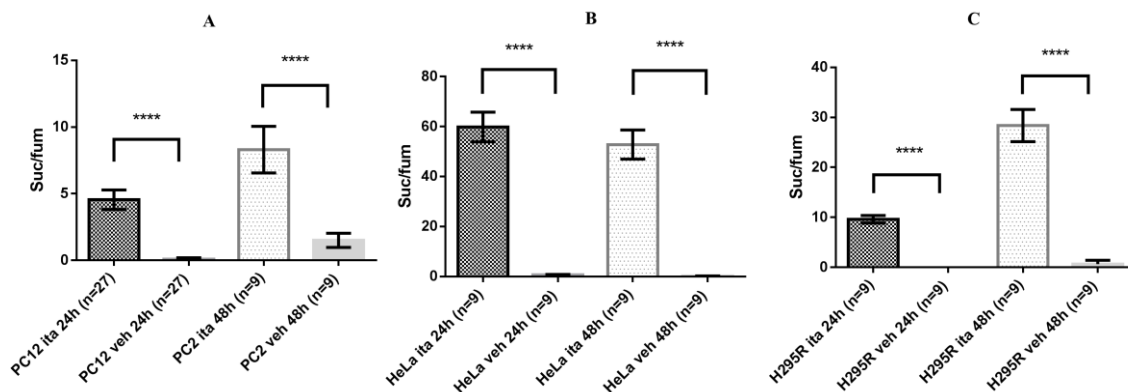

**Figure S2:** Succinate to fumarate ratios in PC12 (Panel A), HeLa (Panel B) and H295R (Panel C) cell lines after itaconate treatment. Ita: itaconate; veh: vehicle; suc/fum: succinate to fumarate ratio. \*\*\*\*:  $p < 0.0001$ .

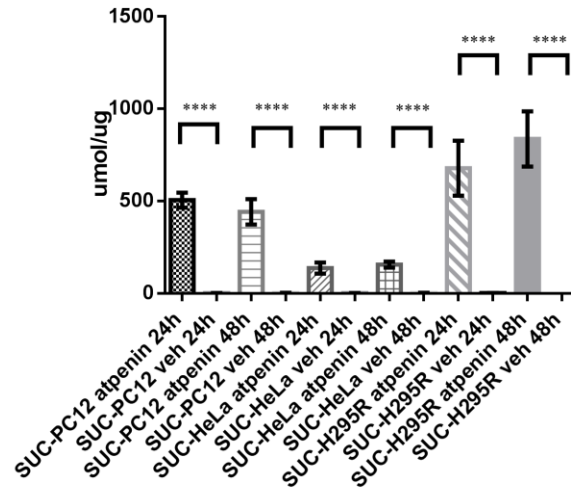

**Figure S3:** Normalized succinate levels after atpenin treatment in PC12, HeLa and H295R cell lines. veh: vehicle; suc: succinate. \*\*\*\*:  $p < 0.0001$ .

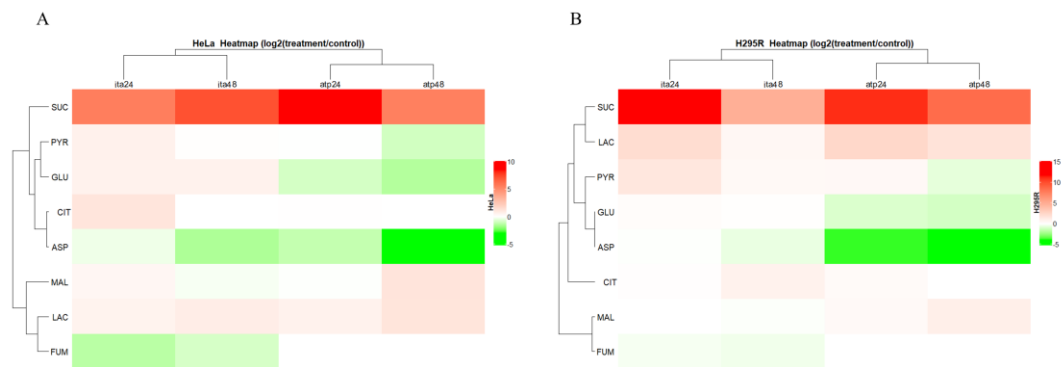

**Figure S4.** HeatMap. Visualization of changes in metabolite concentrations in HeLa (Panel A) and H295R (Panel B) cell lines after itaconate and atpenin treatment. Fold-changes of different metabolic concentration were calculated (values measured after treatment were divided with control values) then the given values were log<sub>2</sub> transformed. These values were used for construction of the heatmap and represented with color scale (red+/white 0/green-). atp24: 24 h atpenin treatment; atp48: 48 h atpenin treatment; ita24: 24 h itaconate treatment; ita48: 48 h itaconate treatment; SUC: succinate; LAC: lactate; PYR: pyruvate; CIT: citrate; MAL: malate; FUM: fumarate; GLU: glutamate; ASP: aspartate.

**Table 1.** Intracellular normalized concentrations of all measured metabolites ( $\mu\text{mol}/\mu\text{g}$ ). All data are presented as mean  $\pm$  SD. CIT: citrate; FUM: fumarate; LAC: lactate; MAL: malate; PYR: pyruvate; SUC: succinate; ASP: aspartate; GLU: glutamate. Ita: itaconate treatment; veh: vehicle treatment. NA: not applicable.

| Samples                      | FUM              | <i>p</i> | LAC                | <i>p</i> | MAL             | <i>p</i> | PYR              | <i>p</i> | SUC              | <i>p</i> | ASP              | <i>p</i> | GLU               | <i>p</i> | CIT             | <i>p</i> |
|------------------------------|------------------|----------|--------------------|----------|-----------------|----------|------------------|----------|------------------|----------|------------------|----------|-------------------|----------|-----------------|----------|
| PC12 ita<br>24 h             | 7.9 $\pm$<br>1.1 | <        | 278.1 $\pm$ 58.6   | 0.4705   | 20.2 $\pm$ 2.5  | 0.9034   | 109.4 $\pm$ 41   | 0.2469   | 35.2 $\pm$ 3.8   | <        | 209.3 $\pm$ 27.3 | 0.4267   | 849.8 $\pm$ 74.2  | 0.008    | 31.16 $\pm$ 2.2 | <        |
| PC12 veh<br>24 h             | 9.9 $\pm$ 1      | 0.0001   | 264.3 $\pm$ 66.6   |          | 20.1 $\pm$ 2.1  |          | 88.9 $\pm$ 24.8  |          | 0.9 $\pm$ 1.1    | 0.0001   | 207.9 $\pm$ 16.2 |          | 895.2 $\pm$ 40.6  |          | 33.75 $\pm$ 2.2 | 0.0001   |
| PC12 ita<br>48 h             | 2.1 $\pm$<br>0.7 | 0.7452   | 295.1 $\pm$ 112.9  | 0.8954   | 0               | NA       | 109.6 $\pm$ 39.2 | 0.3496   | 16.7 $\pm$ 3.5   | <        | 85.3 $\pm$ 19.9  | 0.2474   | 455.1 $\pm$ 90.7  | 0.5387   | 55.4 $\pm$ 13.6 | 0.077    |
| PC12 veh<br>48 h             | 2 $\pm$ 0.5      |          | 287.4 $\pm$ 130.2  |          | 0               |          | 91.7 $\pm$ 39.4  |          | 2.8 $\pm$ 0.4    | 0.0001   | 94.2 $\pm$ 9.2   |          | 474.8 $\pm$ 23.9  |          | 41.4 $\pm$ 2.2  |          |
| PC12<br><i>siSdhb</i>        | 2.8 $\pm$<br>0.7 | 0.0013   | 217.4 $\pm$ 100    | 0.827    | 33.9 $\pm$ 10.1 | 0.0269   | 45.2 $\pm$ 17.9  | 0.7137   | 2.8 $\pm$ 0.4    | <        | 122.5 $\pm$ 26.7 | <        | 496.5 $\pm$ 110.2 | <        | 0               | NA       |
| PC12<br>mock<br><i>siRNA</i> | 3.7 $\pm$<br>0.1 |          | 238.4 $\pm$ 70.5   |          | 43.1 $\pm$ 3.43 |          | 50.5 $\pm$ 11.9  |          | 1.2 $\pm$ 0.4    | 0.0001   | 208.3 $\pm$ 31.2 | 0.0001   | 743.5 $\pm$ 71.7  |          | 0               |          |
| HeLa ita<br>24 h             | 2.8 $\pm$<br>0.8 | <        | 355.8 $\pm$ 106.5  | 0.0135   | 46 $\pm$ 5.9    | 0.0188   | 13.6 $\pm$ 2.8   | <        | 169 $\pm$ 49.8   | <        | 35 $\pm$ 7.2     | <        | 489.7 $\pm$ 113.5 | 0.0471   | 21.5 $\pm$ 2.7  | <        |
| HeLa<br>veh 24 h             | 6.9 $\pm$<br>0.7 | 0.0001   | 243.7 $\pm$ 24.6   |          | 35.2 $\pm$ 8    |          | 8.8 $\pm$ 1.5    | 0.0001   | 3.5 $\pm$ 0.7    | 0.0001   | 44.1 $\pm$ 15.2  | 0.0001   | 328 $\pm$ 63.7    |          | 9.6 $\pm$ 7.2   | 0.0001   |
| HeLa ita<br>48 h             | 2.5 $\pm$<br>0.3 | <        | 1517.5 $\pm$ 835.4 | 0.0181   | 23.2 $\pm$ 5.5  | 0.5309   | 12.3 $\pm$ 3.7   | 0.7298   | 130.9 $\pm$ 24.2 | <        | 16.2 $\pm$ 2.8   | <        | 496.3 $\pm$ 49.5  | <        | 0               | NA       |
| HeLa<br>veh 48 h             | 4.4 $\pm$<br>0.7 | 0.0001   | 877.9 $\pm$ 90.3   |          | 26.2 $\pm$ 3.7  |          | 11.8 $\pm$ 1.6   |          | 0.9 $\pm$ 0.08   | 0.0001   | 45.4 $\pm$ 4.1   | 0.0001   | 328.2 $\pm$ 34.3  |          | 0               |          |
| H295R<br>ita 24 h            | 2.5 $\pm$<br>0.3 | 0.0014   | 110.6 $\pm$ 36.4   | <        | 0               | NA       | 52 $\pm$ 14.5    | <        | 24.2 $\pm$ 2.7   | <        | 92 $\pm$ 17.3    | 0.2547   | 174.5 $\pm$ 24.5  | 0.0188   | 41.4 $\pm$ 4.6  | 0.1020   |
| H295R<br>veh 24 h            | 3 $\pm$ 0.3      |          | 26.4 $\pm$ 6.5     | 0.0001   | 0               |          | 18.5 $\pm$ 2.3   | 0.0001   | 0.007 $\pm$ 0.02 | 0.0001   | 96 $\pm$ 7       |          | 151.2 $\pm$ 9.6   |          | 38.5 $\pm$ 2.2  |          |
| H295R<br>ita 48 h            | 2.7 $\pm$<br>0.4 | 0.0012   | 278 $\pm$ 115.9    | 0.1883   | 38.1 $\pm$ 6    | 0.7137   | 24.5 $\pm$ 9.9   | 0.1421   | 76.9 $\pm$ 11    | <        | 67.9 $\pm$ 8.8   | <        | 309.4 $\pm$ 41.4  | 0.4799   | 13 $\pm$ 1      | <        |
| H295R<br>veh 48 h            | 3.6 $\pm$<br>0.5 |          | 201.5 $\pm$ 91.4   |          | 40.8 $\pm$ 8.8  |          | 18.6 $\pm$ 5.5   |          | 2.65 $\pm$ 3.38  | 0.0001   | 101.7 $\pm$ 12.3 | 0.0001   | 294.8 $\pm$ 35.4  |          | 7.5 $\pm$ 5.7   | 0.0001   |

**Table S2.** Intracellular normalized concentrations of all measured metabolites ( $\mu\text{mol}/\mu\text{g}$ ). All data are presented as mean  $\pm$  SD. CIT: citrate; FUM: fumarate; LAC: lactate; MAL: malate; PYR: pyruvate; SUC: succinate; ASP: aspartate; GLU: glutamate. Ita: itaconate treatment; veh: vehicle treatment.

| Samples            | FUM           | <i>p</i> | LAC                | <i>p</i> | MAL             | <i>p</i> | PYR             | <i>p</i> | SUC              | <i>p</i> | ASP              | <i>p</i> | GLU              | <i>p</i> | CIT            | <i>p</i> |
|--------------------|---------------|----------|--------------------|----------|-----------------|----------|-----------------|----------|------------------|----------|------------------|----------|------------------|----------|----------------|----------|
| PC12 atpenin 24 h  | 1.3 $\pm$ 0.5 | <0.0001  | 198.3 $\pm$ 58     | 0.004    | 19 $\pm$ 0.9    | <0.0001  | 66 $\pm$ 18     | 0.9132   | 504.4 $\pm$ 40.7 | <0.0001  | 42.6 $\pm$ 2.9   | <0.0001  | 334.8 $\pm$ 12.7 | <0.0001  | 15.1 $\pm$ 0.1 | <0.0001  |
| PC12 veh 24 h      | 5.6 $\pm$ 0.6 |          | 122.1 $\pm$ 48     |          | 22.2 $\pm$ 0.9  |          | 61.4 $\pm$ 19   |          | 0.4 $\pm$ 0.9    |          | 139.1 $\pm$ 11.4 |          | 582.1 $\pm$ 36.1 |          | 15.3 $\pm$ 0.0 |          |
| PC12 atpenin 48 h  | 0             | <0.0001  | 332.2 $\pm$ 240.2  | <0.0001  | 14 $\pm$ 2      | <0.0001  | 51.6 $\pm$ 36.4 | 0.0229   | 441 $\pm$ 68.4   | <0.0001  | 18.4 $\pm$ 4.5   | <0.0001  | 138.7 $\pm$ 18.5 | <0.0001  | 10.2 $\pm$ 1.1 | <0.0001  |
| PC12 veh 48 h      | 1.7 $\pm$ 0.2 |          | 67 $\pm$ 36.8      |          | 10 $\pm$ 0.3    |          | 20.7 $\pm$ 10.1 |          | 1.3 $\pm$ 0.3    |          | 50.6 $\pm$ 1.3   |          | 244.6 $\pm$ 9    |          | 7.4 $\pm$ 0.3  |          |
| HeLa atpenin 24 h  | 0             | <0.0001  | 297.7 $\pm$ 33.3   | 0.0039   | 16 $\pm$ 2.4    | 0.5962   | 12.6 $\pm$ 1.7  | 0.9073   | 136 $\pm$ 29.5   | <0.0001  | 6.8 $\pm$ 1.3    | <0.0001  | 51.8 $\pm$ 10.2  | <0.0001  | 10.4 $\pm$ 1.2 | 0.7142   |
| HeLa veh 24 h      | 1.9 $\pm$ 0.3 |          | 197.7 $\pm$ 77.5   |          | 16.5 $\pm$ 1.8  |          | 12.7 $\pm$ 4.3  |          | 0.4 $\pm$ 0.6    |          | 14.8 $\pm$ 2     |          | 93.1 $\pm$ 11.2  |          | 10.2 $\pm$ 1.1 |          |
| HeLa atpenin 48 h  | 0             | <0.0001  | 785.2 $\pm$ 188.4  | <0.0001  | 35.8 $\pm$ 4.2  | <0.0001  | 4.5 $\pm$ 1.5   | 0.0003   | 155.3 $\pm$ 16.2 | <0.0001  | 2.8 $\pm$ 0.4    | <0.0001  | 85 $\pm$ 8.7     | <0.0001  | 0              | NA       |
| HeLa veh 48 h      | 5.1 $\pm$ 0.8 |          | 785.2 $\pm$ 188.4  |          | 15.7 $\pm$ 1.7  |          | 8.3 $\pm$ 1.9   |          | 2 $\pm$ 0.7      |          | 20.6 $\pm$ 4     |          | 224.5 $\pm$ 40.7 |          | 0              |          |
| H295R atpenin 24 h | 0             | <0.0001  | 372.7 $\pm$ 166.4  | <0.0001  | 35.5 $\pm$ 1.5  | <0.0001  | 23.8 $\pm$ 6.7  | 0.0229   | 678 $\pm$ 148.7  | <0.0001  | 7.4 $\pm$ 0.7    | <0.0001  | 83.5 $\pm$ 3.4   | <0.0001  | 22.2 $\pm$ 1.3 | <0.0001  |
| H295R veh 24 h     | 3.5 $\pm$ 0.7 |          | 70.9 $\pm$ 56.8    |          | 28.1 $\pm$ 2.8  |          | 29.5 $\pm$ 14.3 |          | 0.3 $\pm$ 0.9    |          | 100.7 $\pm$ 20   |          | 165.2 $\pm$ 30.7 |          | 17.8 $\pm$ 1.3 |          |
| H295R atpenin 48 h | 0             | <0.0001  | 1473.1 $\pm$ 761.1 | 0.004    | 73.9 $\pm$ 10.6 | <0.0001  | 29.5 $\pm$ 14.3 | 0.0767   | 836 $\pm$ 150    | <0.0001  | 5.5 $\pm$ 1.1    | <0.0001  | 122.8 $\pm$ 15.4 | <0.0001  | 0              | NA       |
| H295R veh 48 h     | 3.8 $\pm$ 0.7 |          | 454.5 $\pm$ 236.8  |          | 37.9 $\pm$ 1.4  |          | 48.1 $\pm$ 26.8 |          | 0                |          | 85 $\pm$ 9.9     |          | 277.1 $\pm$ 18.3 |          | 0              |          |

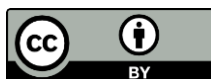

© 2020 by the authors. Licensee MDPI, Basel, Switzerland. This article is an open access article distributed under the terms and conditions of the Creative Commons Attribution (CC BY) license (<http://creativecommons.org/licenses/by/4.0/>).
